# Supplementary material for: Toxoplasma Modulates Signature Pathways of Human Epilepsy, Neurodegeneration & Cancer
Source: PubMed Central journal article supplement (PMC5597608; doi:10.1038/s41598-017-10675-6), 2017-09-13
Supplement: 41598_2017_10675_MOESM1_ESM.pdf [file 41598_2017_10675_MOESM1_ESM.pdf]

## Supplement C

### ***Toxoplasma* Modulates Signature Pathways of Human Epilepsy, Neurodegeneration & Cancer**

Huân M. Ngô<sup>1,2,3,+</sup>, Ying Zhou<sup>1,+</sup>, Hernan Lorenzi<sup>4,+</sup>, Kai Wang<sup>5,+</sup>, Taek-Kyun Kim<sup>5,+</sup>, Yong Zhou<sup>5</sup>, Kamal El Bissati<sup>1</sup>, Ernest Mui<sup>1</sup>, Laura Fraczek<sup>1</sup>, Seesandra V. Rajagopala<sup>4</sup>, Craig W. Roberts<sup>6</sup>, Fiona L. Henriquez<sup>1</sup>, Alexandre Montpetit<sup>7</sup>, Jenefer M. Blackwell<sup>8,9</sup>, Sarra E. Jamieson<sup>9</sup>, Kelsey Wheeler<sup>1</sup>, Ian J. Begeman<sup>1</sup>, Carlos Naranjo-Galvis<sup>1</sup>, Ney Alliey-Rodriguez<sup>1</sup>, Roderick G. Davis<sup>10</sup>, Liliana Soroceanu<sup>11</sup>, Charles Cobbs<sup>11</sup>, Dennis A. Steindler<sup>12</sup>, Kenneth Boyer<sup>13</sup>, A. Gwendolyn Noble<sup>2</sup>, Charles N. Swisher<sup>2</sup>, Peter T. Heydemann<sup>13</sup>, Peter Rabiah<sup>14</sup>, Shawn Withers<sup>1</sup>, Patricia Soteropoulos<sup>15</sup>, Leroy Hood<sup>5</sup>, and Rima McLeod<sup>1\*</sup>

<sup>1</sup>The University of Chicago, Chicago, IL 60637

<sup>2</sup>Northwestern University, Feinberg School of Medicine, Chicago, IL 60611

<sup>3</sup>BrainMicro LLC, New Haven, CT 06511

<sup>4</sup>J Craig Venter Institute, Rockville, MD 20850

<sup>5</sup>Institute of Systems Biology, Seattle, WA 98109

<sup>6</sup>University of Strathclyde, Glasgow G1 1XQ, United Kingdom

<sup>7</sup>Genome Quebec, Montréal, QC H3B 1S6, Canada; McGill University, Montréal, QC H3A 0G4, Canada

<sup>8</sup>Cambridge Institute for Medical Research and Department of Pathology, University of Cambridge, Cambridge CB2 1QP, United Kingdom

<sup>9</sup>Telethon Kids Institute, The University of Western Australia, Perth, Australia

<sup>10</sup>University of Illinois-Chicago, Chicago, IL 60607

<sup>11</sup>California Pacific Medical Center, San Francisco, CA 94114

<sup>12</sup>JM USDA Human Nutrition Research Center on Aging, Tufts University, Boston, MA 02111

<sup>13</sup>Rush University Medical Center, Chicago, IL 60612

<sup>14</sup>Northshore University Health System, Evanston, IL 60201

<sup>15</sup>Rutgers University, Newark, New Jersey 07101

+ Equal contributions

\* To whom Correspondence should be addressed:

Rima McLeod, M.D.

rmcleod@uchicago.edu

Co-Corresponding Authors:

Huân M. Ngô (h-ngo@northwestern.edu)

Hernan Lorenzi, PhD (hlorenzi@jvci.org)

Kai Wang, PhD (kai.wang@systemsbiology.org)

T.K. Kim, MS (tkim@systemsbiology.org)

Current Addresses:

FLH, IBEHR School of Science and Sport, University of the West of Scotland, Paisley, PA1 2BE, UK

## Supplemental Figure Legend

**Figure S1.** MDS plot of RNA-seq profiles of uninfected MM6, S-NSC and S-NDC cells.
