# Supplementary material for: Toxoplasma Modulates Signature Pathways of Human Epilepsy, Neurodegeneration & Cancer
Source: PubMed Central journal article supplement (PMC5597608; doi:10.1038/s41598-017-10675-6), 2017-09-13

# MDS of uninfected MM6, S-NSC and S-NDC mRNA-seq

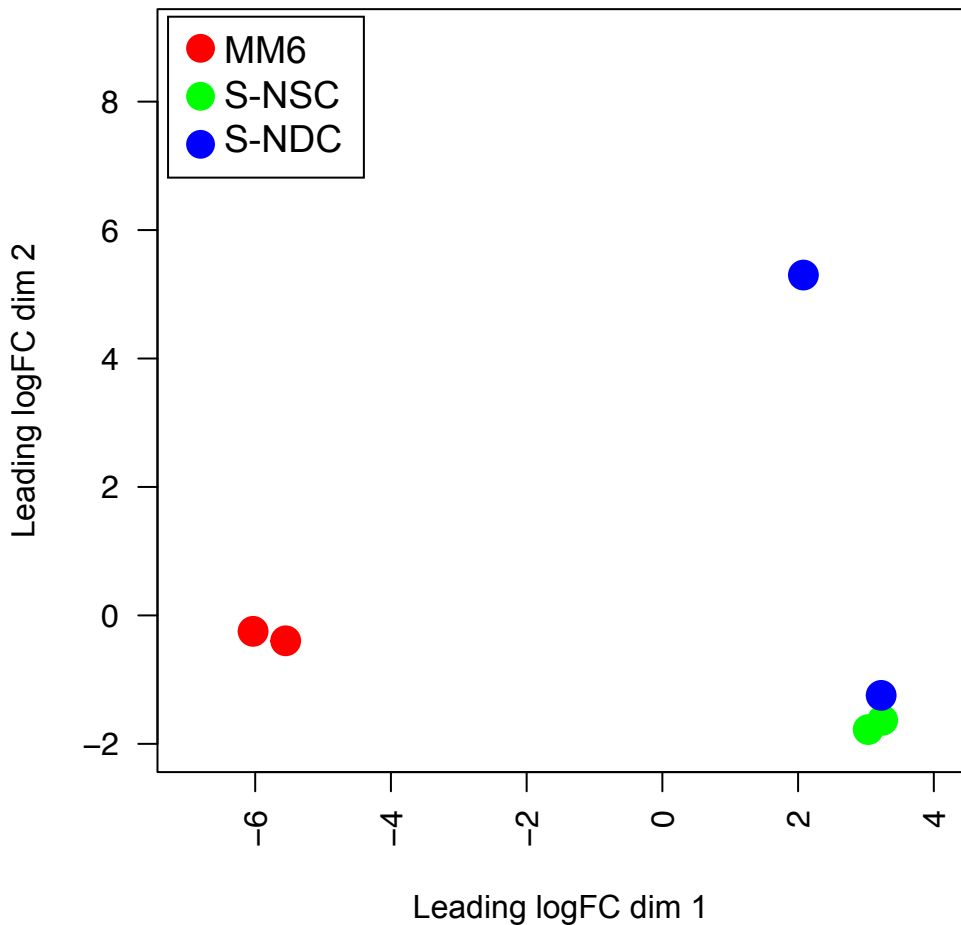

Supplement: 41598_2017_10675_MOESM2_ESM.pdf [file 41598_2017_10675_MOESM2_ESM.pdf]
