# Supplementary material for: Toxoplasma Modulates Signature Pathways of Human Epilepsy, Neurodegeneration & Cancer
Source: PubMed Central journal article supplement (PMC5597608; doi:10.1038/s41598-017-10675-6), 2017-09-13
Supplement: 41598_2017_10675_MOESM6_ESM.pdf [file 41598_2017_10675_MOESM6_ESM.pdf]

## Supplement D

### *Toxoplasma* Modulates Signature Pathways of Human Epilepsy, Neurodegeneration & Cancer

Huân M. Ngô<sup>1,2,3,+</sup>, Ying Zhou<sup>1,+</sup>, Hernan Lorenzi<sup>4,+</sup>, Kai Wang<sup>5,+</sup>, Taek-Kyun Kim<sup>5,+</sup>, Yong Zhou<sup>5</sup>, Kamal El Bissati<sup>1</sup>, Ernest Mui<sup>1</sup>, Laura Fraczek<sup>1</sup>, Seesandra V. Rajagopala<sup>4</sup>, Craig W. Roberts<sup>6</sup>, Fiona L. Henriquez<sup>1, 16</sup>, Alexandre Montpetit<sup>7</sup>, Jenefer M. Blackwell<sup>8,9</sup>, Sarra E. Jamieson<sup>9</sup>, Kelsey Wheeler<sup>1</sup>, Ian J. Begeman<sup>1</sup>, Carlos Naranjo-Galvis<sup>1</sup>, Ney Alliey-Rodriguez<sup>1</sup>, Roderick G. Davis<sup>10</sup>, Liliana Soroceanu<sup>11</sup>, Charles Cobbs<sup>11</sup>, Dennis A. Steindler<sup>12</sup>, Kenneth Boyer<sup>13</sup>, A. Gwendolyn Noble<sup>2</sup>, Charles N. Swisher<sup>2</sup>, Peter T. Heydemann<sup>13</sup>, Peter Rabiah<sup>14</sup>, Shawn Withers<sup>1</sup>, Patricia Soteropoulos<sup>15</sup>, Leroy Hood<sup>5</sup>, and Rima McLeod<sup>1\*</sup>

<sup>1</sup>The University of Chicago, Chicago, IL 60637

<sup>2</sup>Northwestern University, Feinberg School of Medicine, Chicago, IL 60611

<sup>3</sup>BrainMicro LLC, New Haven, CT 06511

<sup>4</sup>J Craig Venter Institute, Rockville, MD 20850

<sup>5</sup>Institute of Systems Biology, Seattle, WA 98109

<sup>6</sup>University of Strathclyde, Glasgow G1 1XQ, United Kingdom

<sup>7</sup>Genome Quebec, Montréal, QC H3B 1S6, Canada; McGill University, Montréal, QC H3A 0G4, Canada

<sup>8</sup>Cambridge Institute for Medical Research and Department of Pathology, University of Cambridge, Cambridge CB2 1QP, United Kingdom

<sup>9</sup>Telethon Kids Institute, The University of Western Australia, Perth, Australia

<sup>10</sup>University of Illinois-Chicago, Chicago, IL 60607

<sup>11</sup>California Pacific Medical Center, San Francisco, CA 94114

<sup>12</sup>JM USDA Human Nutrition Research Center on Aging, Tufts University, Boston, MA 02111

<sup>13</sup>Rush University Medical Center, Chicago, IL 60612

<sup>14</sup>Northshore University Health System, Evanston, IL 60201

<sup>15</sup>Rutgers University, Newark, New Jersey 07101

<sup>+</sup> Equal contributions

\* To whom Correspondence should be addressed:

Rima McLeod, M.D.

[rmcleod@uchicago.edu](mailto:rmcleod@uchicago.edu)

Co-Corresponding Authors:

Huân M. Ngô (h-ngo@northwestern.edu)

Hernan Lorenzi, PhD (hlorenzi@jcv.i.org)

Kai Wang, PhD (kai.wang@systemsbiology.org)

T.K. Kim, MS (tkim@systemsbiology.org)

Current Addresses:

FLH, IBEHR School of Science and Sport, University of the West of Scotland, Paisley, PA1 2BE, UK

## Supplemental D

**Accession numbers or RNAseq datasets.** mRNA- and miRNA-seq sequencing reads were deposited in NCBI-SRA under the following accession numbers: SRR1204591, SRR1204592, SRR1204593, SRR1204595, SRR1204597, SRR1204612, SRR1204613, SRR1204659, SRR1204660, SRR1204731, SRR1204733, SRR1204775, SRR1204777, SRR1204805, SRR1205066, SRR1205097, SRR1205099, SRR1205104, SRR1205181, SRR1205186, SRR1205191, SRR1205196, SRR1205219, SRR1205722, SRR1205723, SRR1205730, SRR1205734, SRR1205796, SRR1205798, SRR1205829, SRR1205901, SRR1205910, SRR1205911, SRR1205912, SRR1205915, SRR1205924, SRR1205936, SRR1205938, SRR1205942, SRR1205948, SRR1205949, SRR1205956, SRR1205957, SRR1205963, SRR1205966, SRR1205976 and SRR1205993.
